# Supplementary material
Source: Research Square preprint supplement (doi:10.21203/rs.3.rs-9778411/v1)
Supplement: Supplementary file 1 [file 93cdf3ecaaf85dab50238674.docx]

| Species | Total (n=228) |
| --- | --- |
| *K. Pneumoniae* | 70 (30.7%) |
| *E. Coli* | 59 (26.0%) |
| *E. Faecalis* | 28 (12.3%) |
| *S. aureus* | 9 (3.9%) |
| *E. Faecium* | 8 (3.5%) |
| *S. Agalactiae* | 7 (3.1%) |
| *L. Monocytogenes* | 5 (2.2%) |
| *E. Cloacae* | 4 (1.8%) |
| *S. Hominis* | 4 (1.8%) |
| *S. Gallolyticus* | 4 (1.8%) |
| *K. aerogenes* | 3 (1.3%) |
| *S. haemolyticus* | 3 (1.3%) |
| *S. warneri* | 2 (0.8%) |
| *S. Epidermidis* | 2 (0.8%) |
| *C. tropicalis* | 2 (0.8%) |
| *A. pittsii* | 2 (0.8%) |
| *M. osloensis* | 2 (0.8%) |
| *S. marcescens* | 1 (0.4%) |
| *C. freundii* | 1 (0.4%) |
| *H. haemolyticus* | 1 (0.4%) |
| *K. oxytoca* | 1 (0.4%) |
| *A. baumannii* | 1 (0.4%) |
| *C. parapsilosis* | 1 (0.4%) |
| *E. asburiae* | 1 (0.4%) |
| *Salmonella spp* | 1 (0.4%) |
| *C. albicans* | 1 (0.4%) |
| *S. capitis* | 1 (0.4%) |
| *S. oralis* | 1 (0.4%) |
| *P. mirabilis* | 1 (0.4%) |
| *P. ornitholytica* | 1 (0.4%) |
| *P. putida* | 1 (0.4%) |

Supplementary Table 1. All pathogens detected in blood cultures
